# Supplementary material for: Identification of isoforms of aspartic acid residues in peptides by 2D UV-MS fingerprinting of cold ions
Source: Royal Society of Chemistry journal article supplement (doi:10.1039/c7an02044a), 2018-01-01
Supplement: c7an02044a1.pdf [file c7an02044a1.pdf]

## Identification of Isoforms of Asp Residue in Peptides by 2D UV-MS Fingerprinting of Cold Ions

Vladimir Kopysov,<sup>a</sup> Mikhail V. Gorshkov,<sup>b</sup> and Oleg V. Boyarkin<sup>a†</sup>

*Laboratoire de Chimie Physique Moléculaire, École Polytechnique Fédérale de Lausanne, CH-1015 Lausanne, Switzerland.*

*† Electronic address: oleg.boiarin@epfl.ch*

*Institute of Energy Problems of Chemical Physics, Russian Academy of Sciences, Moscow, Russia.*

|                                                                                                      |          |
|------------------------------------------------------------------------------------------------------|----------|
| <b>1. Figure S1. Full-range UV spectra of isomers.</b>                                               | <b>2</b> |
| <b>2. Figure S2. Expanded view of UVPD mass spectra</b>                                              | <b>3</b> |
| <b>3. Note S1. Library-based identification of isomers in their mixtures.</b>                        | <b>4</b> |
| <b>4. Figure S3. RMSD of calculated solution concentrations<br/>in different UV spectral ranges.</b> | <b>6</b> |
| <b>5. UV spectra of quaternary mixture, its linear fit</b>                                           | <b>7</b> |
| <b>6. Table S1. Specific wavelengths used in the limited<br/>2D UV-MS decomposition.</b>             | <b>8</b> |

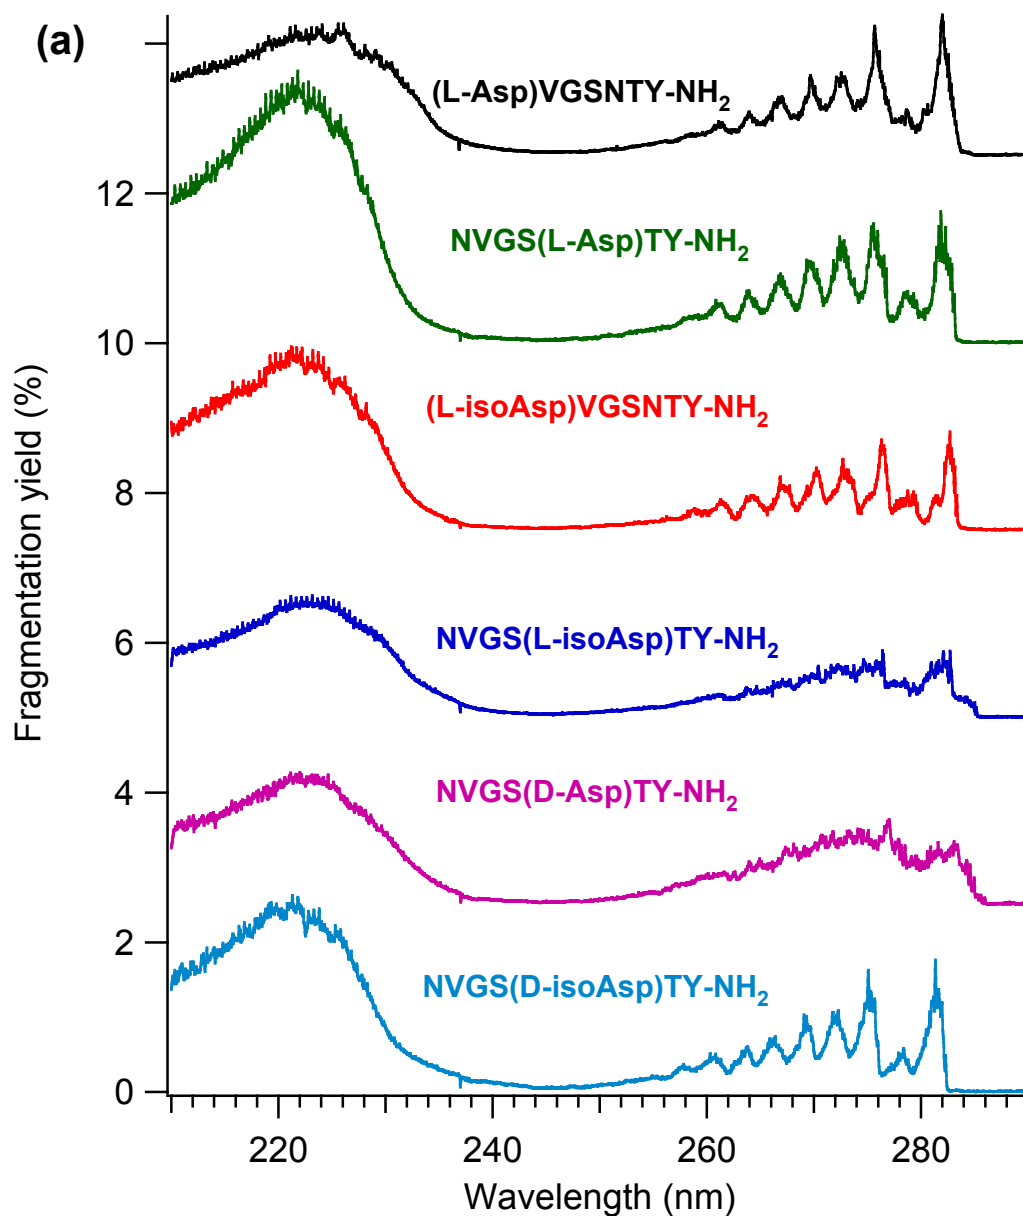

**Figure S1.** Photofragmentation UV spectra of singly protonated amylin(30-37) peptide with different isoforms and positions of Asp residue. The spectra have been generated by integrating the respective 2D UV-MS over  $m/z$ . The 2D UV-MS arrays are normalized to the UV OPO pulse energy; each mass spectrum is normalized to the total ion signal, including the parent ion. For graphical clarity, subsequent UV spectra are offset relative to the preceding ones by 2.5%.

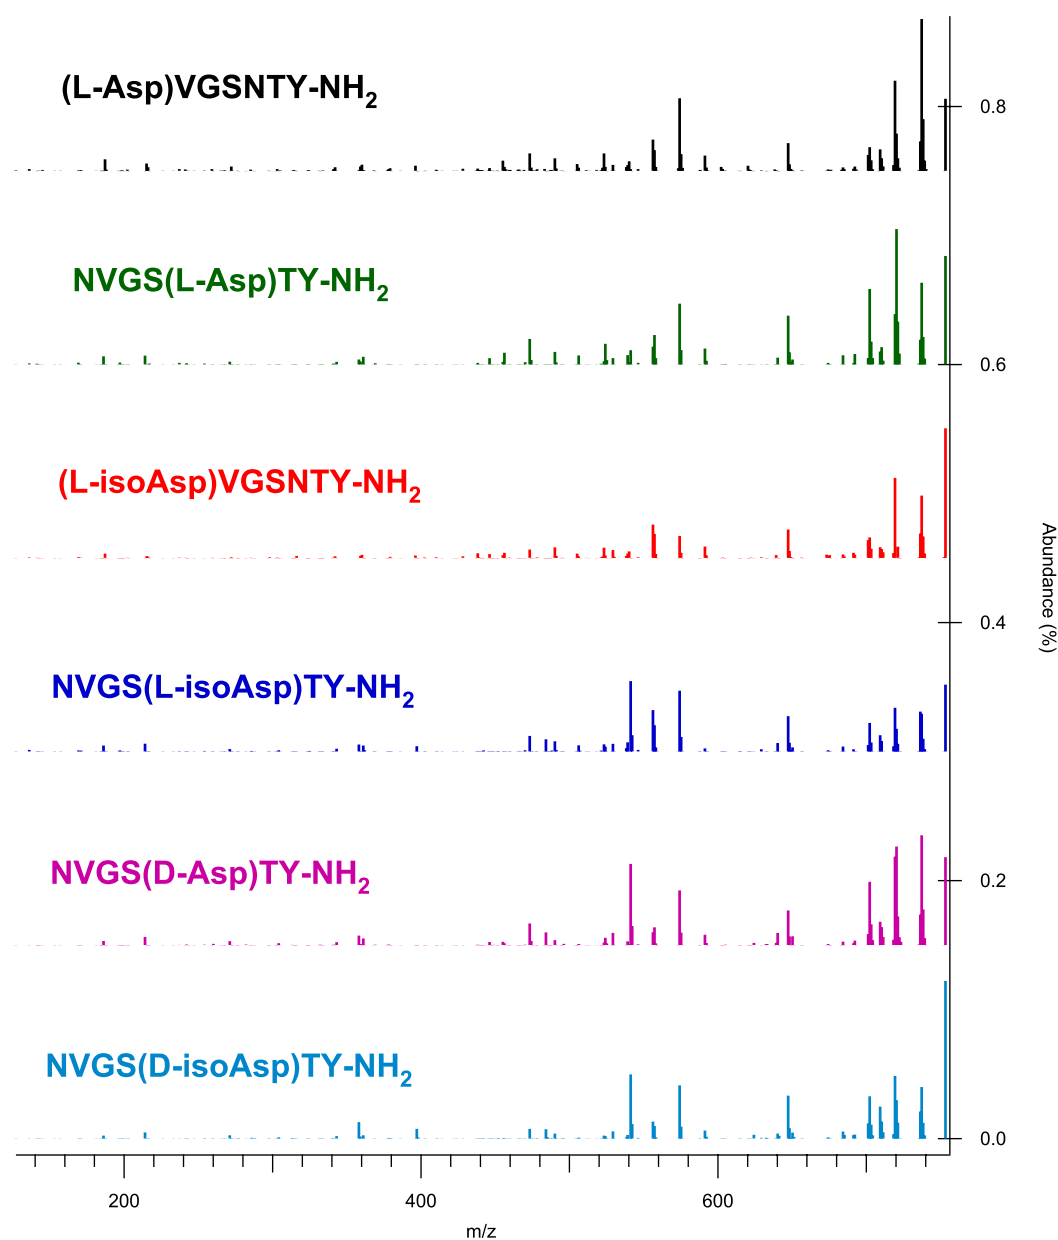

**Figure S2.** UVPD mass spectra of singly protonated amylin(30-37) peptide with different isoforms and positions of Asp residue. The spectra have been generated by integrating the respective 2D UV-MS over wavelength coordinate. The 2D UV-MS arrays are normalized to the UV OPO pulse energy; each mass spectrum is normalized to the total ion signal, including the parent ion. For graphical clarity, subsequent mass spectra are offset relative to the preceding ones by 0.15%, respectively.

**Note S1. Library-based identification of isomers in their mixtures.**

The library-based identification of isomers in their mixtures implies 1) measuring 2D UV-MS spectra of the species to be identified; 2) constructing a library of the corresponding UV-MS matrices; 3) measuring 2D UV-MS spectra of the mixtures to be analyzed; and 4) decomposing the corresponding UV-MS matrices into a linear combination of the library matrices. The last step is very similar to decomposing a vector in a basis, that is, expressing the vector as a sum of the basis vectors multiplied by the coefficients reflecting the coordinates of the vector relative to this basis.

Building a library of fingerprints for individual isomeric compounds begins with transforming 2D UV-MS spectra, which are recorded on the Exactive Orbitrap-based mass spectrometer and stored as RAW files, to UV-MS matrices stored as plain-text files. This is done by a PeakByPeak software package (Spectroswiss Sarl, Switzerland)<sup>1</sup> written in Python. It first calculates an integrated photofragmentation mass spectrum by summing up all single mass scans, each of which is preliminary corrected for a baseline by means of a model-free Friedrichs algorithm.<sup>2</sup> The mass spectrum is used to find the  $m/z$  values of all the photofragment ions that appear during the UV laser scan as well as the  $m/z$  values of parent ions. Then PeakByPeak processes all single mass scans one by one using the resulting set of  $m/z$  values as a reference peak list. For each mass scan, it evaluates the noise level ( $\sigma$ )<sup>3</sup> and identifies all the peaks, the intensity of which is higher than  $5\sigma$ . Only the peaks, the  $m/z$  values of which are found in the reference peak list (with a tolerance of 10 ppm), are finally retained. The output data are stored as an  $n$ -by- $m$  matrix  $D$ ; an element  $D_{ij}$  of the matrix is the intensity of the  $j$ -th peak from the reference list in the  $i$ -th mass scan and therefore corresponds to the intensity of an ion with the mass-to-charge ratio of  $m/z_j$  at the UV laser wavelength of  $\lambda_i$ . Each row of the matrix  $D$  is divided by the sum of row elements, that is, normalized on the total ion signal; then, each column, except those that correspond to parent ions, are divided by the recorded OPO power curve, that is, normalized to 1 mJ energy of UV OPO. UV-MS matrices  $D^{(i)}$ ,  $i = 1 \dots k$ , where  $k$  is the number of individual components, form a library of fingerprints.

The same procedure is used to obtain a matrix  $D^{(mix)}$  of a mixture from its 2D UV-MS spectrum. The UV-MS matrices of individual compounds as well as the matrix of the mixture are then imported into MATLAB and processed by an in-house developed MATLAB script. First, we define a set of wavelengths, at which the UV-MS matrix of a mixture will be analyzed, and generate a set of  $m/z$  values of all the photofragment peaks present in the UV-MS matrices of individual components. Each of the matrices is then mapped onto these new wavelength and  $m/z$  scales in the following way: if an initial matrix contains a peak at a certain  $m/z$  (from the new set of  $m/z$  values), then the UV spectrum at this  $m/z$  (i.e., a column

vector in the initial UV-MS matrix) is projected onto the new wavelength scale by means of linear interpolation; otherwise, the respective column vector in the resulting matrix is filled with zeros.

If we denote the number of individual components by  $k$ , the number of selected wavelengths as  $n$ , and the total number of mass peaks by  $m$ , the new matrices of individual components form a basis of a  $k$ -dimensional subset of a vector space of  $n$ -by- $m$  matrices. The projected matrix of a mixture (some of  $k$  species may be absent in the mixture, which corresponds to zero concentration) should then be a linear combination of the library matrices:

$$D^{(mix)} = \sum_{i=1}^k x_i \cdot D^{(i)}$$

However, due to noise in the experimental data and possible data processing errors, the system of  $n \times m$  equations becomes inconsistent. A general approach to find an approximate solution of an overdetermined system (indeed,  $n \cdot m \gg k$ ) is to minimize the sum of squared residuals with respect to variables. More specifically, we minimize the squared Frobenius norm of the residual matrix subject to non-negativity constraints:

$$\{x_1, \dots, x_k\} = \arg \min_{x \geq 0} \left\| D^{(mix)} - \sum_{i=1}^k x_i \cdot D^{(i)} \right\|_F$$

using the MATLAB built-in function *lsqnonneg*. To find the relative concentrations of the mixture components, the determined coefficients are divided by their sum:

$$\hat{c}_i = 100\% \cdot \frac{x_i}{\sum_{j=1}^k x_j}$$

Finally, the accuracy of the identification of individual components in a set of  $s$  mixtures is assessed in terms of the root-mean-square deviation (RMSD):

$$RMSD = \sqrt{\frac{1}{k \cdot s} \cdot \left( \sum_{i=1}^s \sum_{j=1}^k (c_j^{(i)} - \hat{c}_j^{(i)})^2 \right)}$$

which is a measure of discrepancy between the relative concentration  $c_j^{(i)}$  of the  $j$ -th component in the  $i$ -th mixture and its predicted value  $\hat{c}_j^{(i)}$  averaged over all the components and all the mixtures.

## References

1. Spectroswiss Sarl, <http://spectroswiss.ch>.
2. M. Friedrichs, *J. Biomol. NMR*, 1995, **5**, 147–153.
3. K. O. Zhurov, A. N. Kozhinov, L. Fornelli and Y. O. Tsybin, *Anal. Chem.*, 2014, **86**, 3308–3316.

(a)

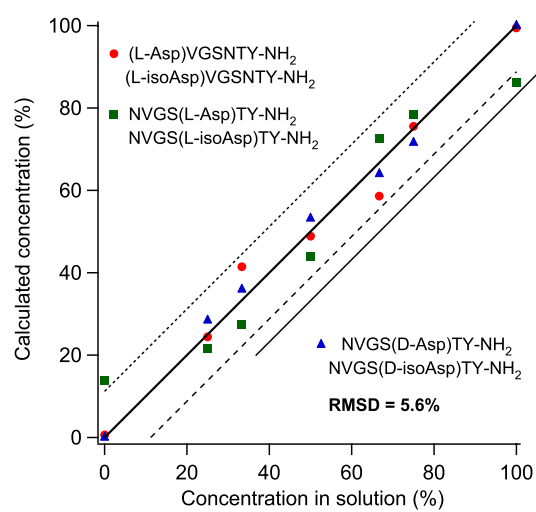

(b)

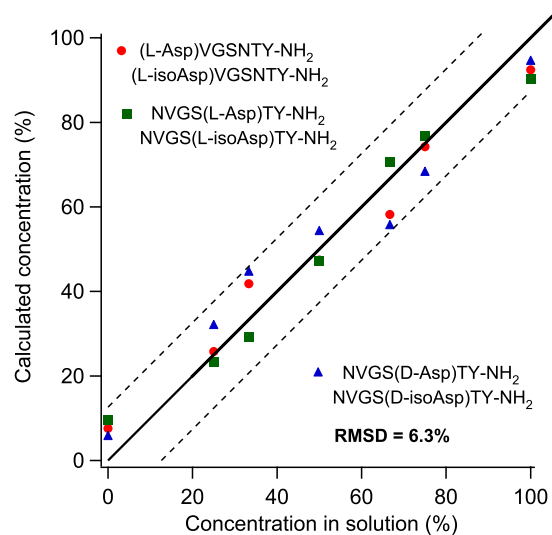

**Figure S3.** Calculated relative concentrations of six singly protonated amylin(30-37) peptides as a function of their relative concentrations in 12 pairwise solution mixtures for (a) the entire 290-210 nm and for 250-210 nm spectral range.

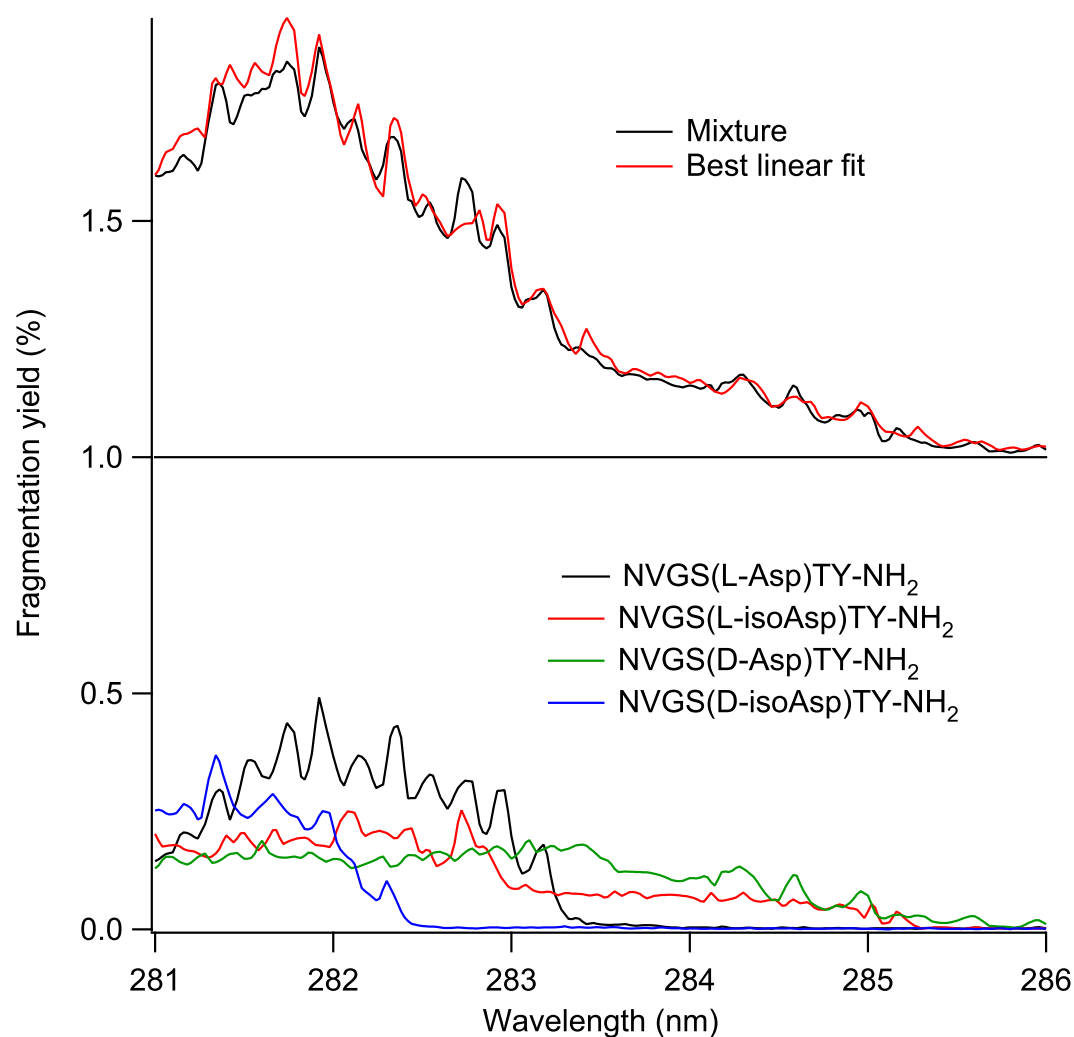

**Figure S4.** (a) UV spectrum of an equimolar quaternary solution mixture of singly protonated NVGS(L-Asp)TY-NH<sub>2</sub>, NVGS(L-isoAsp)TY-NH<sub>2</sub>, NVGS(D-Asp)TY-NH<sub>2</sub> and NVGS(D-isoAsp)TY-NH<sub>2</sub> isomeric peptides and its best linear fit by as it results from the decomposition procedure of the respective 2D UV-MS data arrays, and (b) library UV spectra of the mixed peptides, scaled by their calculated relative concentrations. All UV spectra were generated by integrating the respective 2D UV-MS data arrays over  $m/z$ .

**Table S1.** Wavelengths of the first maxima within 281-286 nm interval in UV spectra of protonated isomeric peptides amylin(30-37). The decompositions of 2D UV-MS data arrays with these wavelengths only result in RMSD of 2.5%.

| Isomeric peptide                 | Wavelength, nm |
|----------------------------------|----------------|
| NVGS(D-isoAsp)TY-NH <sub>2</sub> | 281.35         |
| NVGS(L-Asp)TY-NH <sub>2</sub>    | 281.86         |
| (L-Asp)VGSNTY-NH <sub>2</sub>    | 282.00         |
| (L-isoAsp)VGSNTY-NH <sub>2</sub> | 282.71         |
| NVGS(L-isoAsp)TY-NH <sub>2</sub> | 282.72         |
| NVGS(D-Asp)TY-NH <sub>2</sub>    | 283.09         |
